# Supplementary material
Source: PubMed Central journal article supplement (PMC4447229)
Supplement: supp_fj.14-267096_Supplemental_Figure1.pdf [file supp_fj.14-267096_Supplemental_Figure1.pdf]

## Supplemental figure 1

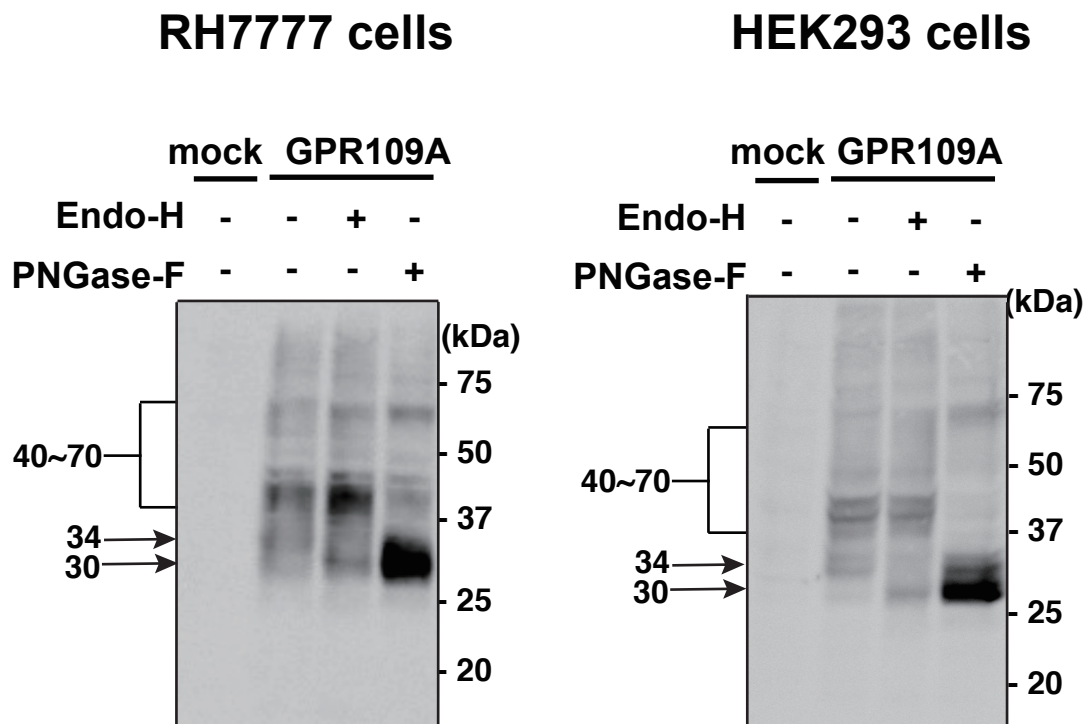

Twenty-four hours after transfection, RH7777 (left) and HEK293 (right) cells transfected with empty vector (mock) or hGPR109A/WT were homogenized; then, they were treated with Endo-H (+) or PNGase-F (+) or were left untreated (-). The molecular mass of hGPR109A was determined using SDS-PAGE and western blot analyses, as described in the Materials and Methods. Approximate molecular sizes are shown in kDa on the left, while the positions of molecular markers are indicated on the right. Data are representative of 3 independent experiments that yielded similar results.
