# Supplementary material
Source: PubMed Central journal article supplement (PMC4447229)
Supplement: supp_fj.14-267096_Supplemental_Table1.pdf [file supp_fj.14-267096_Supplemental_Table1.pdf]

## Supplemental Table 1

### Primer sequences used to generate hGPR109A point mutations

| Mutant | Forward primer                                                    | Reverse primer                                     |
|--------|-------------------------------------------------------------------|----------------------------------------------------|
| N2A    | gctcgaattccgcatgtaccctacgacgtgcccgactacgc<br>cgctcggcaccatctgcagg | aaaagatatcttaaggagaggtgggccagataagagggg<br>c       |
| N17A   | ctggaaatagacaagaaggcctgctgtgtgtccgagatgac                         | gtcatctcggaacacacagcagccttctgtctattccag            |
| N86A   | ctgcctgcccttctgatggacgcctatgtgaggcgtgggact<br>gg                  | ccagtccaacgcctcacataggcctcatcaggaaggga<br>ggcag    |
| N171A  | gaagaagatgccgatccaggctggcggtgcaattgtgca<br>gc                     | gctgcacaaattgcaccgccagcctggatcggcatcttctc          |
| N175A  | gccgatccagaatggcggtgacgcttctgtcagcagcttcagc                       | gctgaagctgctgcacaaagctgcaccgccattctggatcgg<br>c    |
| N265A  | cctgcacacttcgggcacgcagcctgtgaagtgtaccgctcg<br>gtgg                | ccaccgagcggctacacttcacaagcctgcgtgcccgagg<br>tgcagg |
| D14A   | caggatcacttctgaaatagccaagaagaactgctgtgtgtt<br>ccg                 | cggaacacacagcagttcttctggctattccagaaagtgatc<br>ctg  |
| K15A   | ggatcacttctgaaatagacgcgaagaactgctgtgtgtcc<br>gag                  | ctcggaacacacagcagttcttctgcgtctattccagaaagt<br>atcc |
| K16A   | cacttctgaaatagacaaggcgaactgctgtgtgtccgaga<br>tg                   | catctcggaacacacagcagttcgccttctctattccagaaa<br>gtg  |
| C18A   | ggaaatagacaagaagaacgcctgtgtgtccgagatgacttc                        | gaagtcatctcggaacacacagcgttcttctgtctattcc           |
| C19A   | ggaaatagacaagaagaactgcgctgtgttccgagatgacttc<br>attg               | caatgaagtcacatcggaacacagcagttcttctgtctatt<br>cc    |
| V20A   | ggaaatagacaagaagaactgctgtgcgttccgagatgactt<br>cattg               | caatgaagtcacatcggaacacacagcagttcttctgtctatt<br>cc  |
| C19S   | tagacaagaagaactgctgtgttccgagatgacttca                             | tgaagtcatctcggaacacagcagttcttctgtctata             |
| C19T   | ggaaatagacaagaagaactgcactgtgttccgagatgacttc<br>attg               | caatgaagtcacatcggaacacagtcagttcttctgtctatt<br>cc   |
| C19V   | tagacaagaagaactgcgtgtgttccgagatgacttca                            | tgaagtcatctcggaacacacagcagttcttctgtctata           |
| C19Y   | tagacaagaagaactgctatgtgttccgagatgacttca                           | tgaagtcatctcggaacacatagcagttcttctgtctata           |
| C19M   | tagacaagaagaactgcatggtgttccgagatgacttca                           | tgaagtcatctcggaacacacagcagttcttctgtctata           |
| C19D   | tagacaagaagaactgcgatgtgttccgagatgacttca                           | tgaagtcatctcggaacacacagcagttcttctgtctata           |
| C19E   | tagacaagaagaactgcgaagtgttccgagatgacttca                           | tgaagtcatctcggaacacttcgagttcttctgtctata            |
| C100A  | ggaagttfgggacatccctccccggctgatgctctcatgttg<br>g                   | ccaacatgaagagcatcagccgggcaggatgtcccaaa<br>cttcc    |
| C177A  | ggtgcaaattggccagcagcttcagc                                        | gctgaagctgctggcacaattgcacc                         |
| C183A  | cagcttcagcatgccataccttccag                                        | ctggaaggatgggcgatgctgaagctg                        |
| C266A  | ggcacgcagaatgctgaagtgtaccgc                                       | gcggtacacttcagcattctgcgtgcc                        |
