# Supplementary material
Source: PubMed Central journal article supplement (PMC4447229)
Supplement: supp_fj.14-267096_Supplemental_Table2.pdf [file supp_fj.14-267096_Supplemental_Table2.pdf]

## Supplemental Table 2

### Comprehensive search for GPCRs with atypical Asn-X-Cys sequences

Forty-four GPCRs possessing N-terminal atypical Asn-X-Cys sequences, and 11 GPCRs (red) with atypical Asn-X-Cys sequences in the extracellular regions, but no Asn-X-Ser/Thr motifs.

| Gene cord | Protein name                                                                                | Asn-x-Ser/Thr sequence |     |     |     | Asn-x-Cys sequence |     |     |     |
|-----------|---------------------------------------------------------------------------------------------|------------------------|-----|-----|-----|--------------------|-----|-----|-----|
|           |                                                                                             | NT                     | EL1 | EL2 | EL3 | NT                 | EL1 | EL2 | EL3 |
| Q8TDS4    | GPR109A (HM74A, Niacin receptor 1)                                                          | -                      | -   | -   | -   | +                  | -   | +   | -   |
| P49019    | GPR109B (HM74, Niacin receptor 2)                                                           | -                      | -   | -   | -   | +                  | -   | +   | -   |
| Q8NH80    | Putative olfactory receptor 10D3                                                            | -                      | -   | -   | -   | +                  | -   | -   | -   |
| Q8NGK5    | Olfactory receptor 52M1                                                                     | -                      | -   | -   | -   | +                  | -   | -   | -   |
| A6NMZ5    | Olfactory receptor 4C45                                                                     | -                      | -   | -   | -   | -                  | +   | -   | -   |
| Q8NGF3    | Olfactory receptor 51D1                                                                     | -                      | -   | -   | -   | -                  | +   | -   | -   |
| Q8NH56    | Olfactory receptor 52N5                                                                     | -                      | -   | -   | -   | -                  | +   | -   | -   |
| A6NDL8    | Olfactory receptor 6C68                                                                     | -                      | -   | -   | -   | -                  | +   | -   | -   |
| P49238    | CX3C chemokine receptor 1 (CX3CR1)                                                          | -                      | -   | -   | -   | -                  | -   | +   | -   |
| Q86SM5    | Mas-related GPCR member G                                                                   | -                      | -   | -   | -   | -                  | -   | +   | -   |
| P51677    | C-C chemokine receptor type 3 (CCR3)                                                        | -                      | -   | -   | -   | -                  | -   | -   | +   |
| Q9NQ84    | GPCR family C group 5 member C                                                              | -                      | -   | +   | -   | +                  | -   | -   | -   |
| O6-241    | Brain-specific angiogenesis inhibitor 2                                                     | +                      | -   | -   | -   | +                  | -   | -   | -   |
| P41180    | Extracellular calcium-sensing receptor                                                      | +                      | -   | -   | -   | +                  | -   | -   | -   |
| P48960    | CD97 antigen                                                                                | +                      | -   | -   | -   | +                  | -   | -   | -   |
| Q9HCU4    | Cadherin EGF LAG seven-pass G-type receptor 2                                               | +                      | -   | -   | -   | +                  | -   | -   | -   |
| Q9NYQ7    | Cadherin EGF LAG seven-pass G-type receptor 3                                               | +                      | -   | -   | -   | +                  | -   | -   | -   |
| Q9HBW9    | EGF-TM7-latrophilin-related protein                                                         | +                      | -   | -   | -   | +                  | -   | -   | -   |
| Q14246    | EGF-like module-containing mucin-like hormone receptor-like 1                               | +                      | -   | -   | -   | +                  | -   | +   | -   |
| Q9UHX3    | EGF-like module-containing mucin-like hormone receptor-like 2                               | +                      | -   | -   | -   | +                  | -   | -   | -   |
| Q9BY15    | EGF-like module-containing mucin-like hormone receptor-like 3                               | +                      | -   | -   | -   | +                  | -   | -   | -   |
| Q8IZF2    | Probable G-protein coupled receptor 116                                                     | +                      | -   | -   | -   | +                  | -   | +   | -   |
| Q96K78    | Probable G-protein coupled receptor 128                                                     | +                      | -   | -   | -   | +                  | -   | -   | -   |
| Q6PRD1    | Probable G-protein coupled receptor 179                                                     | +                      | -   | -   | -   | +                  | -   | -   | -   |
| P32249    | G-protein coupled receptor 183 (EBI2)                                                       | +                      | -   | -   | -   | +                  | -   | -   | -   |
| Q99679    | Probable G-protein coupled receptor 21                                                      | +                      | -   | -   | -   | +                  | -   | -   | -   |
| Q9HC97    | G-protein coupled receptor 35                                                               | +                      | -   | -   | -   | +                  | -   | -   | +   |
| Q14416    | Metabotropic glutamate receptor 2 (mGluR2)                                                  | +                      | -   | -   | -   | +                  | -   | -   | -   |
| Q14832    | Metabotropic glutamate receptor 3 (mGluR3)                                                  | +                      | -   | -   | -   | +                  | -   | -   | -   |
| P30550    | Gastrin-releasing peptide receptor (GRP-R)                                                  | +                      | -   | -   | -   | +                  | -   | -   | -   |
| Q9BXB1    | Leucine-rich repeat-containing G-protein coupled receptor 4 (G-protein coupled receptor 48) | +                      | -   | -   | -   | +                  | -   | -   | -   |
| O94910    | Calcium-independent alpha-latrotoxin receptor 1                                             | +                      | -   | -   | -   | +                  | -   | -   | -   |
| Q99705    | Melanin-concentrating hormone receptor 1                                                    | +                      | -   | -   | -   | +                  | -   | -   | -   |
| P49286    | Melatonin receptor type 1B (Mel-1B-R)                                                       | +                      | -   | -   | -   | +                  | -   | -   | -   |
| Q8NHC8    | Olfactory receptor 2T6                                                                      | +                      | -   | -   | -   | +                  | -   | -   | -   |
| P30953    | Olfactory receptor 1E1                                                                      | +                      | -   | -   | +   | +                  | -   | -   | -   |
| P47887    | Olfactory receptor 1E2                                                                      | +                      | -   | -   | +   | +                  | -   | -   | -   |
| P25101    | Endothelin-1 receptor (Endothelin A receptor)                                               | +                      | -   | +   | -   | +                  | -   | -   | +   |
| Q5T601    | Probable G-protein coupled receptor 110                                                     | +                      | -   | +   | -   | +                  | -   | -   | -   |
| Q5T6X5    | G-protein coupled receptor family C group 6 member A                                        | +                      | -   | +   | -   | +                  | -   | -   | -   |
| Q86Y34    | Probable G-protein coupled receptor 97                                                      | +                      | -   | +   | -   | +                  | -   | -   | -   |

|        |                                                                        |   |   |   |   |   |   |   |   |
|--------|------------------------------------------------------------------------|---|---|---|---|---|---|---|---|
| Q13255 | Metabotropic glutamate receptor 1 (mGluR1)                             | + | - | + | - | + | - | - | - |
| Q9UBY5 | Lysophosphatidic acid receptor 3 (LPA-3, Edg-7)                        | + | - | + | - | + | - | - | - |
| Q99677 | Lysophosphatidic acid receptor 4 (LPA-4, P2Y9)                         | + | - | + | - | + | - | - | - |
| Q8IZP9 | G-protein coupled receptor 64                                          | + | - | + | + | + | - | - | - |
| O60242 | Brain-specific angiogenesis inhibitor 3                                | + | + | - | - | + | - | - | - |
| Q9NYQ6 | Cadherin EGF LAG seven-pass G-type receptor 1                          | + | + | - | - | + | - | - | - |
| Q86SQ3 | Putative EGF-like module-containing mucin-like hormone receptor-like 4 | + | + | - | - | + | - | - | - |
| P30968 | Gonadotropin-releasing hormone receptor                                | + | + | - | - | + | - | - | - |
| Q8NHC5 | Olfactory receptor 14A16                                               | + | + | - | - | + | - | - | - |
| Q99835 | Smoothed homolog (SMO) (Protein Gx)                                    | + | + | - | + | + | - | - | - |
